# Supplementary material for: Spatial cell disparity in the colonial choanoflagellate Salpingoeca rosetta
Source: bioRxiv or medRxiv preprint supplement (doi:10.1101/653519), 2019-05-30

**AMIRA**

1. segmentation of cells and organelles

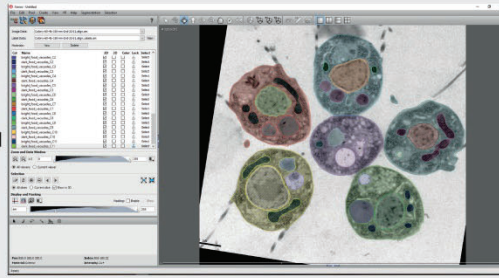

2.1 surface rendering

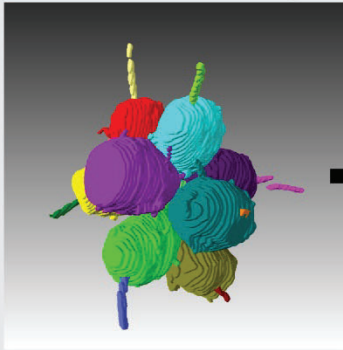

2.2 first surface smoothing

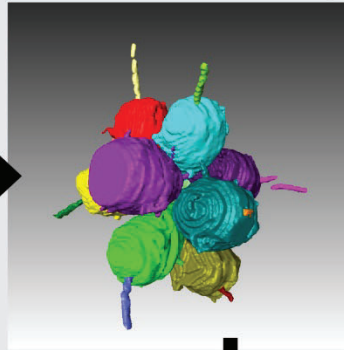

3.1. extraction of every single material (eg. mitochondria) from the image stack

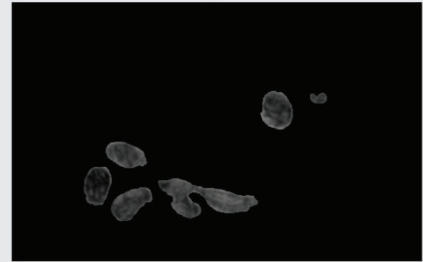

**MAYA**

2.5 third surface smoothing

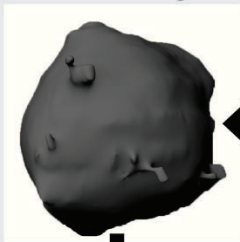

2.4 second surface smoothing

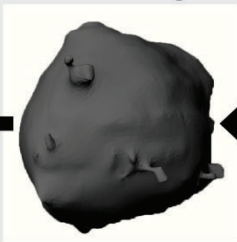

2.3 imported surface model

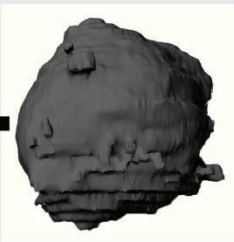

2.6 surface coloration

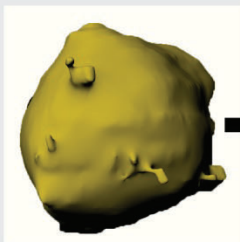

2.7 final surface rendering of a whole colony

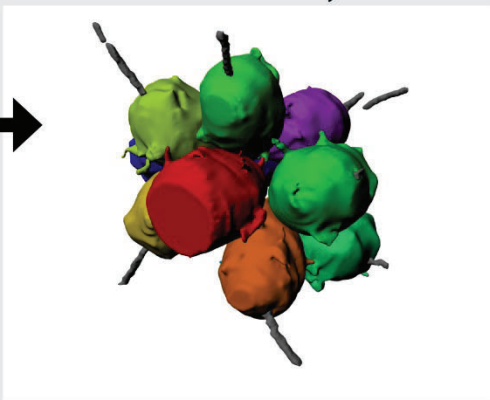

**FIJI**

3.2 masking and preparation of a binary image

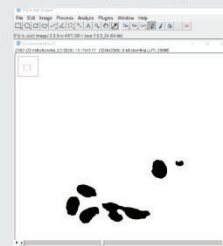

3.3 measurement of the surface area

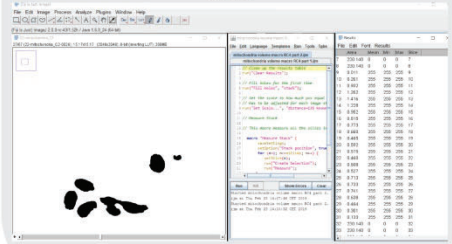

**EXCEL**

3.4 transfer of the measured values to Microsoft EXCEL and calculation of volumes and ratios

S2

A 0°

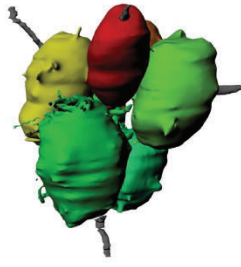

90°

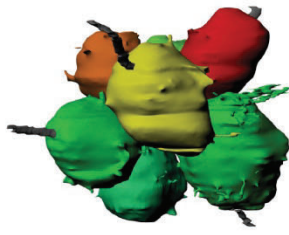

180°

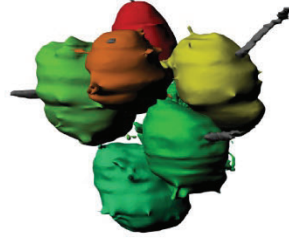

270°

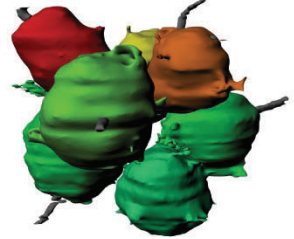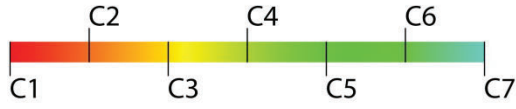

B C1

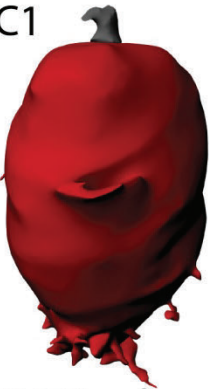

$V = 18,8541 \mu\text{m}^3$

C C2

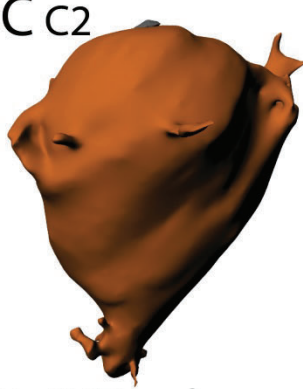

$V = 15,9781 \mu\text{m}^3$

D C3

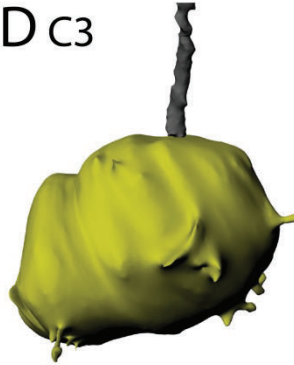

$V = 29,7504 \mu\text{m}^3$

E C4

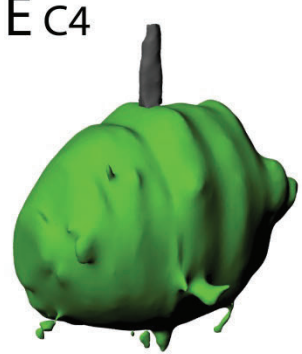

$V = 36,4994 \mu\text{m}^3$

F C5

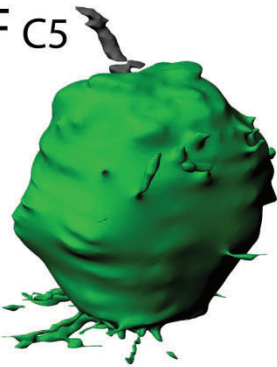

$V = 37,7110 \mu\text{m}^3$

G C6

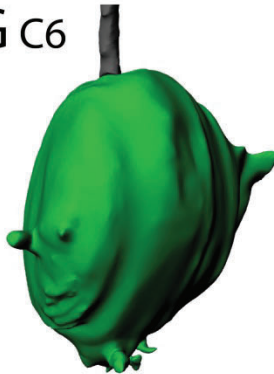

$V = 22,1971 \mu\text{m}^3$

H C7

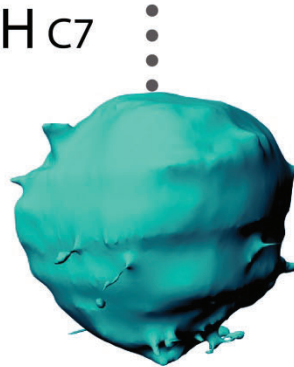

$V = 22,5861 \mu\text{m}^3$

S3

A 0°

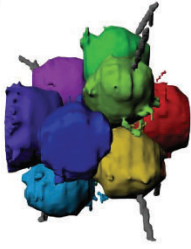

90°

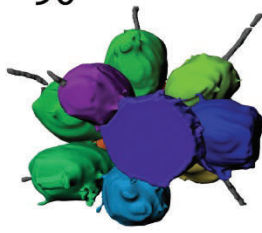

180°

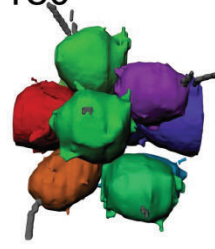

270°

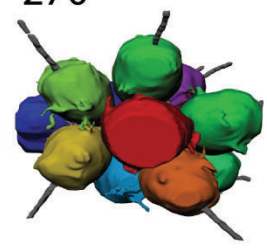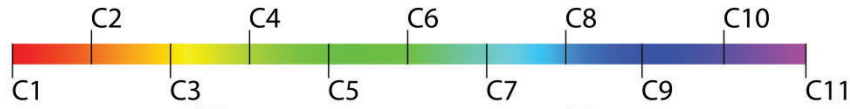

B C1

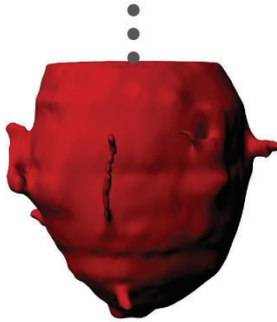

$V = 35,3241 \mu\text{m}^3$

C C2

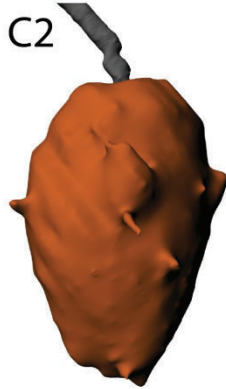

$V = 22,5701 \mu\text{m}^3$

D C3

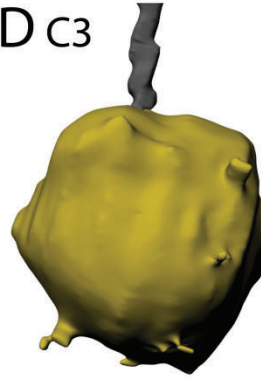

$V = 24,5022 \mu\text{m}^3$

E C4

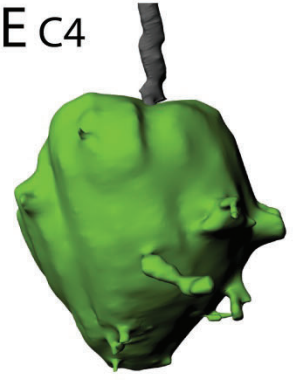

$V = 24,6890 \mu\text{m}^3$

F C5

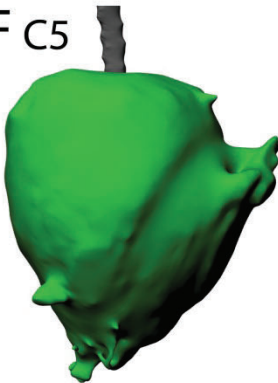

$V = 25,3476 \mu\text{m}^3$

G C6

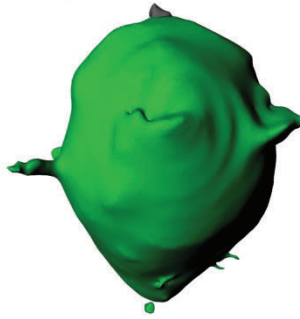

$V = 27,7535 \mu\text{m}^3$

H C7

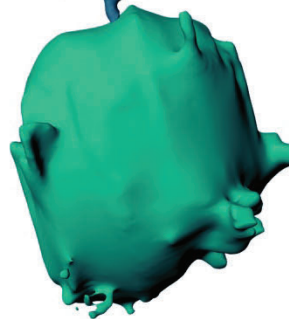

$V = 24,7695 \mu\text{m}^3$

I C8

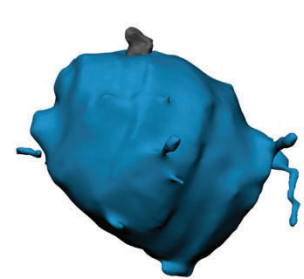

$V = 21,7361 \mu\text{m}^3$

J C9

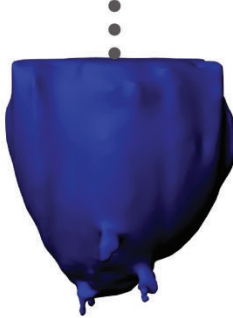

$V = 27,6794 \mu\text{m}^3$

K C10

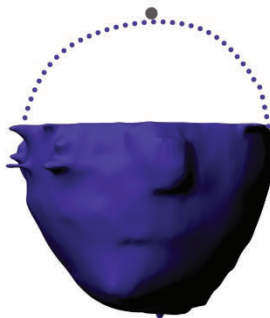

$V = 46,5795 \mu\text{m}^3$

L C11

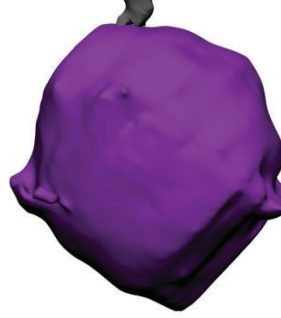

$V = 19,1235 \mu\text{m}^3$



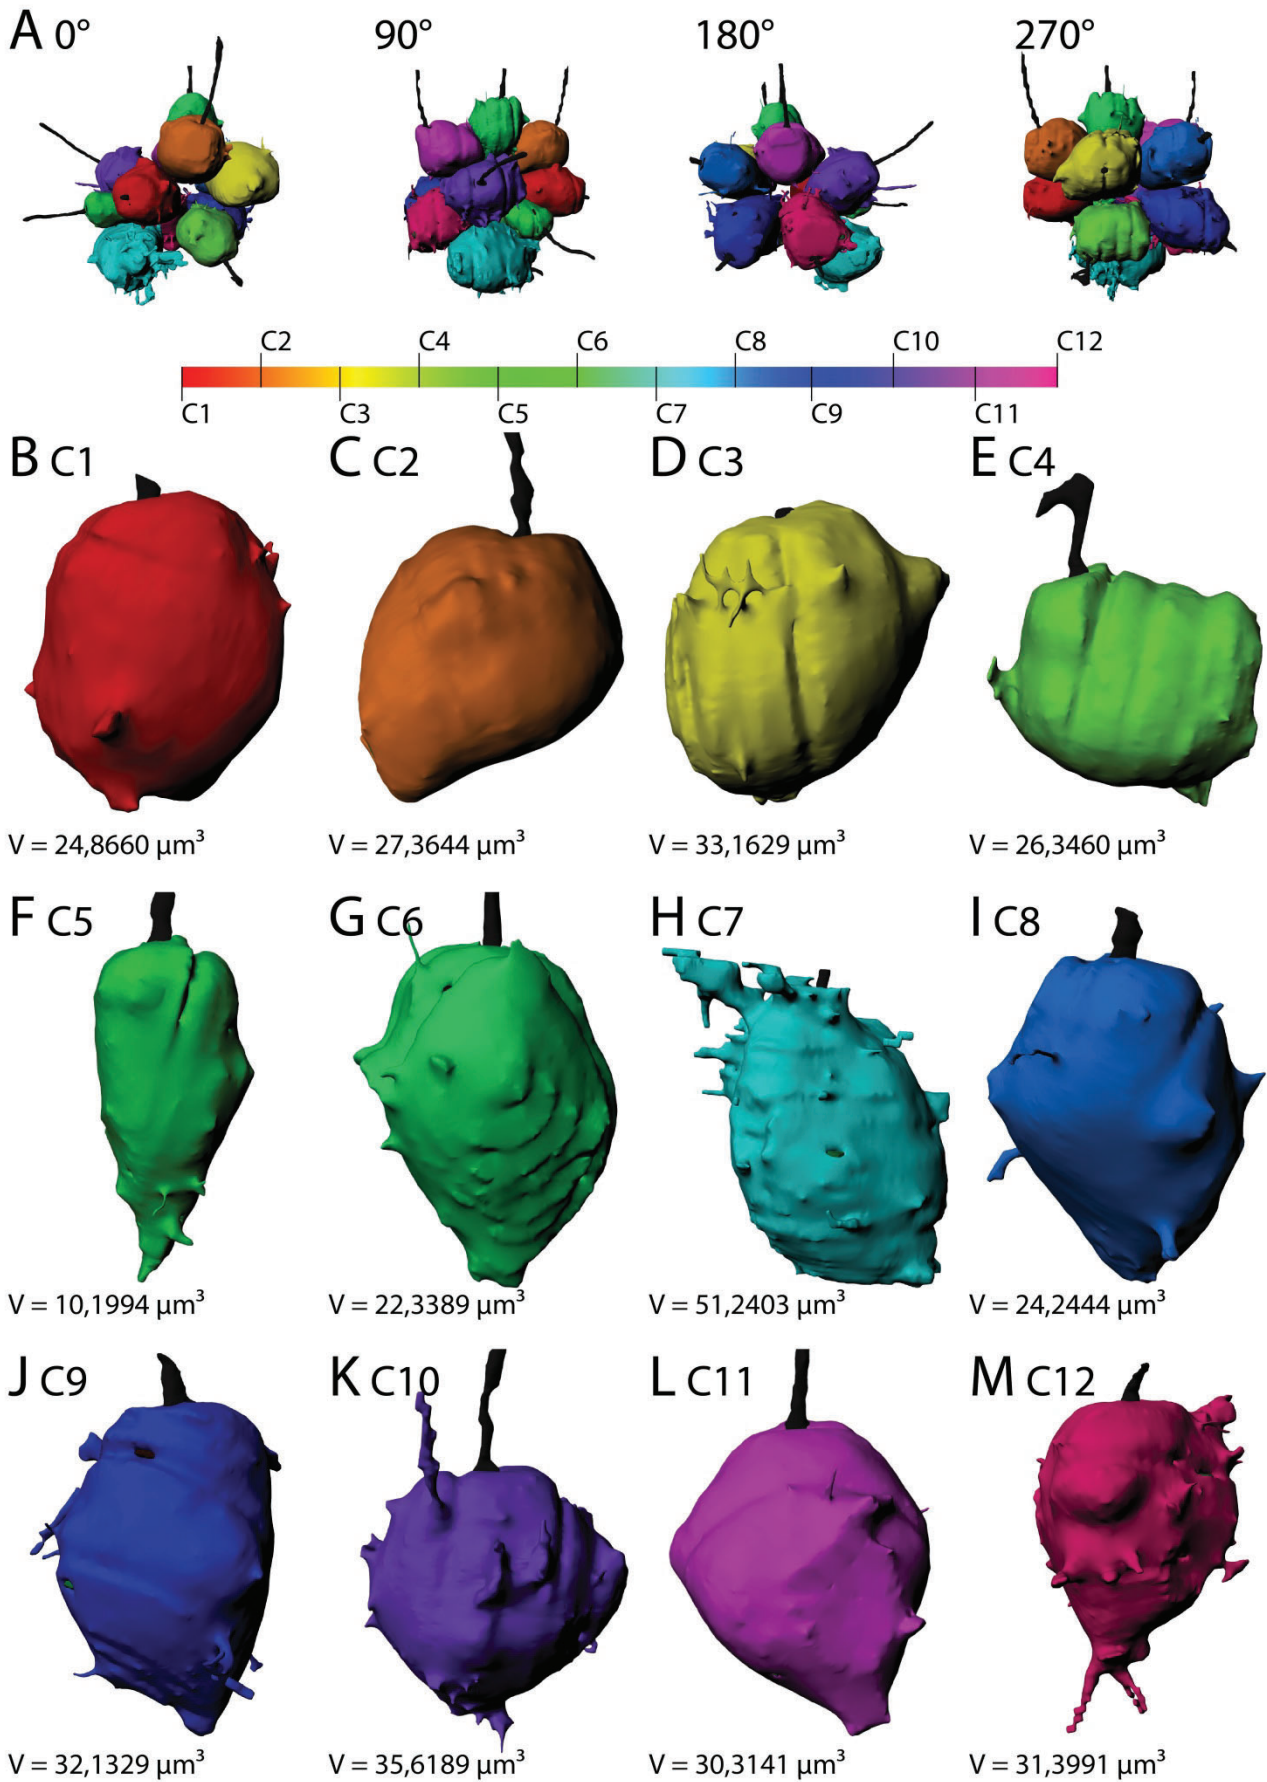

S5

A 0°

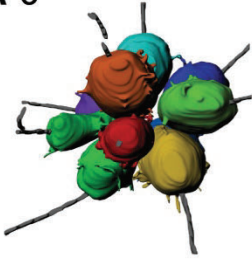

90°

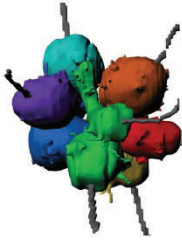

180°

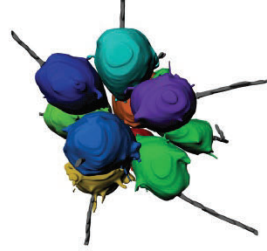

270°

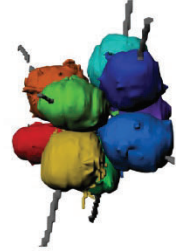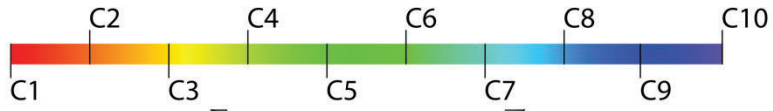

B C1

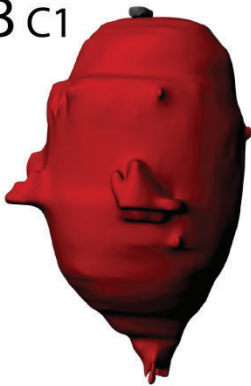

V = 18,0932  $\mu\text{m}^3$

C C2

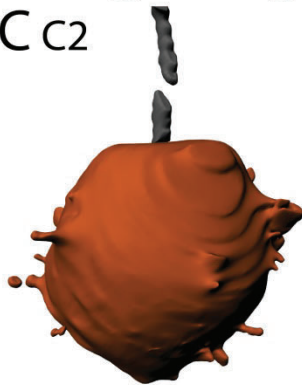

V = 35,3603  $\mu\text{m}^3$

D C3

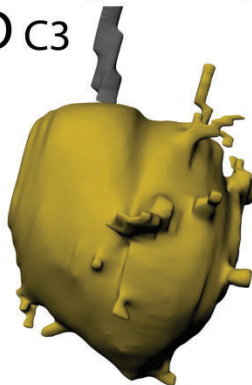

V = 30,9752  $\mu\text{m}^3$

E C4

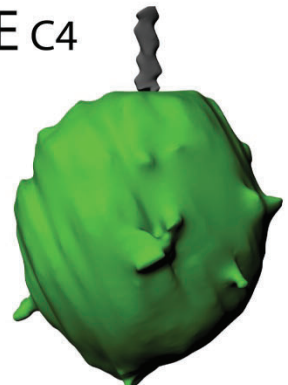

V = 31,4369  $\mu\text{m}^3$

F C5

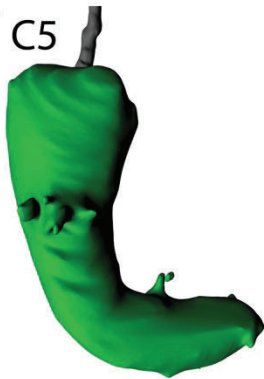

V = 13,9838  $\mu\text{m}^3$

G C6

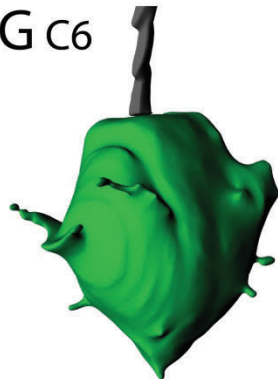

V = 24,7512  $\mu\text{m}^3$

H C7

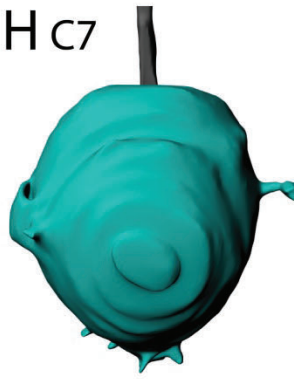

V = 31,4192  $\mu\text{m}^3$

I C8

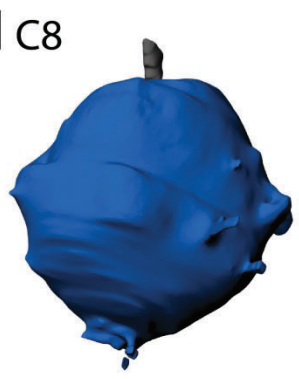

V = 36,4673  $\mu\text{m}^3$

J C9

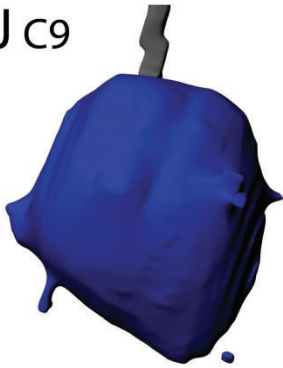

V = 27,1277  $\mu\text{m}^3$

K C10

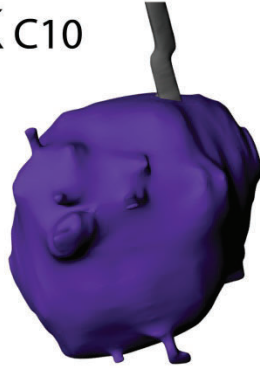

V = 25,7801  $\mu\text{m}^3$

A c1    B c2    C c3    D c4    E c5    F c6    G c7

nucleus

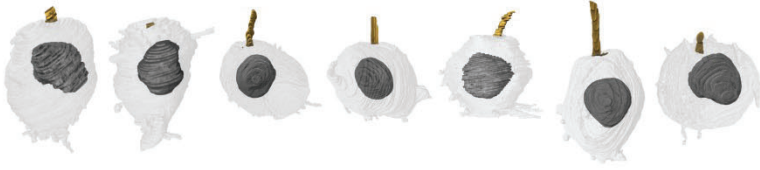

mitochondria

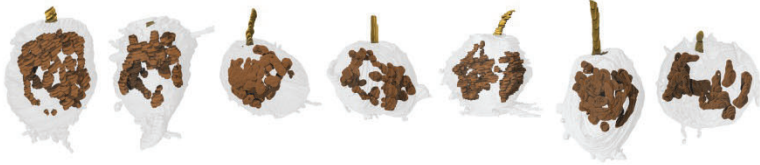

food vacuoles

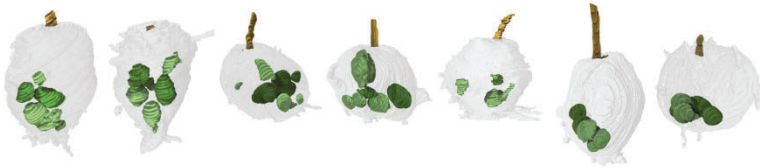

merged

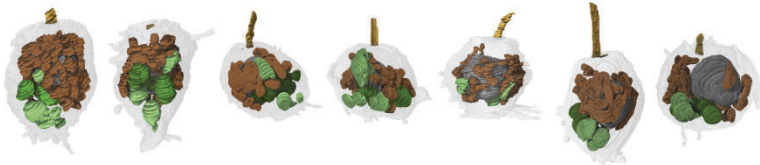

A C1 B C2 C C3 D C4 E C5 F C6 G C7 H C8 I C9 J C10 K C11

nucleus

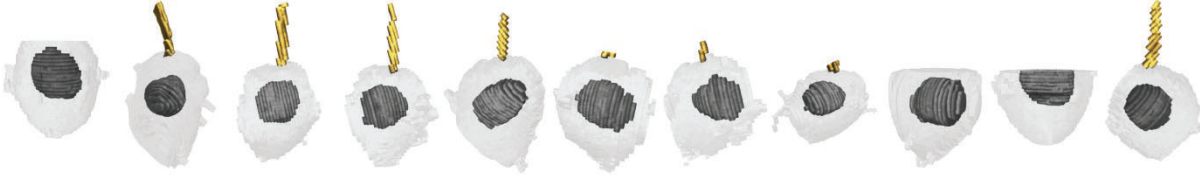

mitochondria

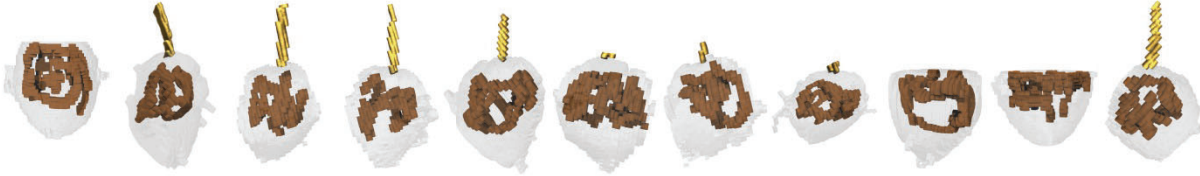

food vacuoles

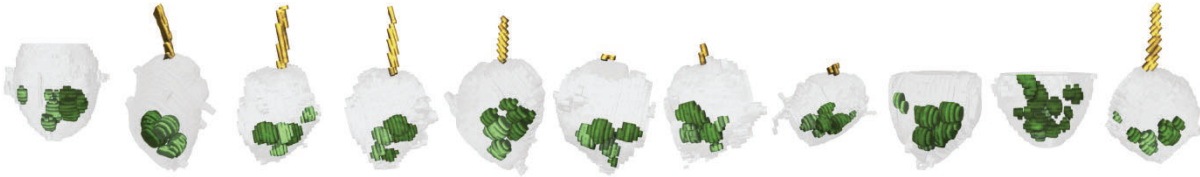

merged

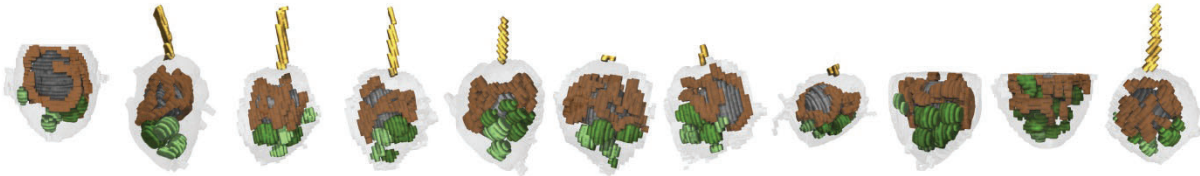



A C1 B C2 C C3 D C4 E C5 F C6 G C7 H C8 I C9 J C10 K C11 I C12

nucleus

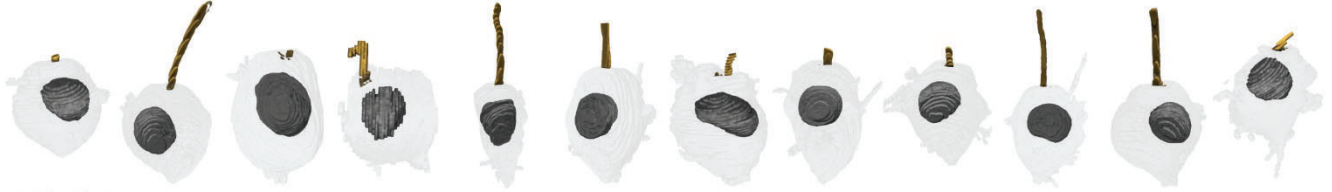

mitochondria

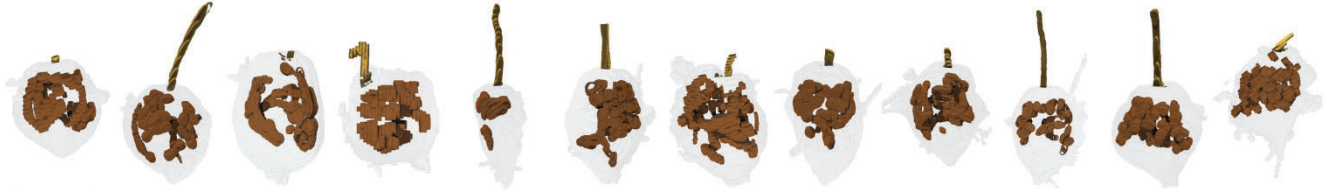

food vacuoles

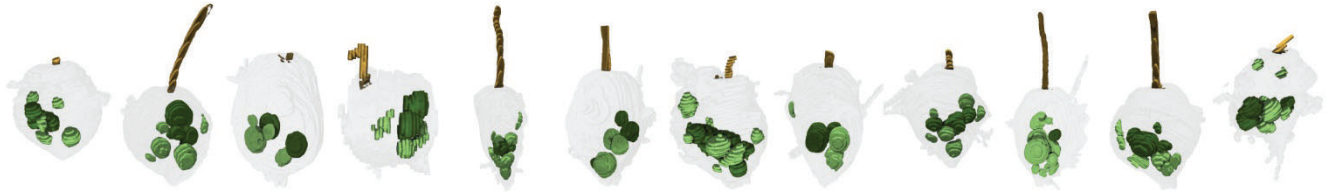

merged

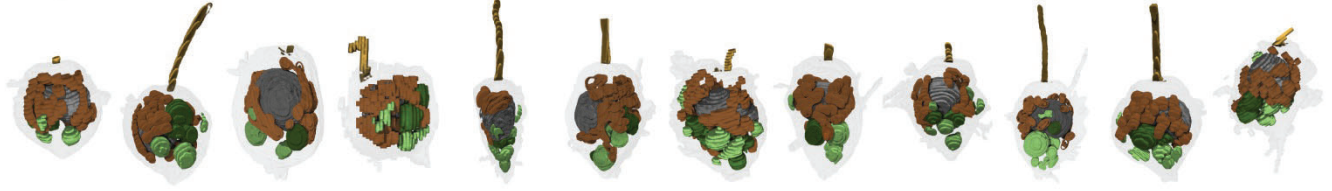



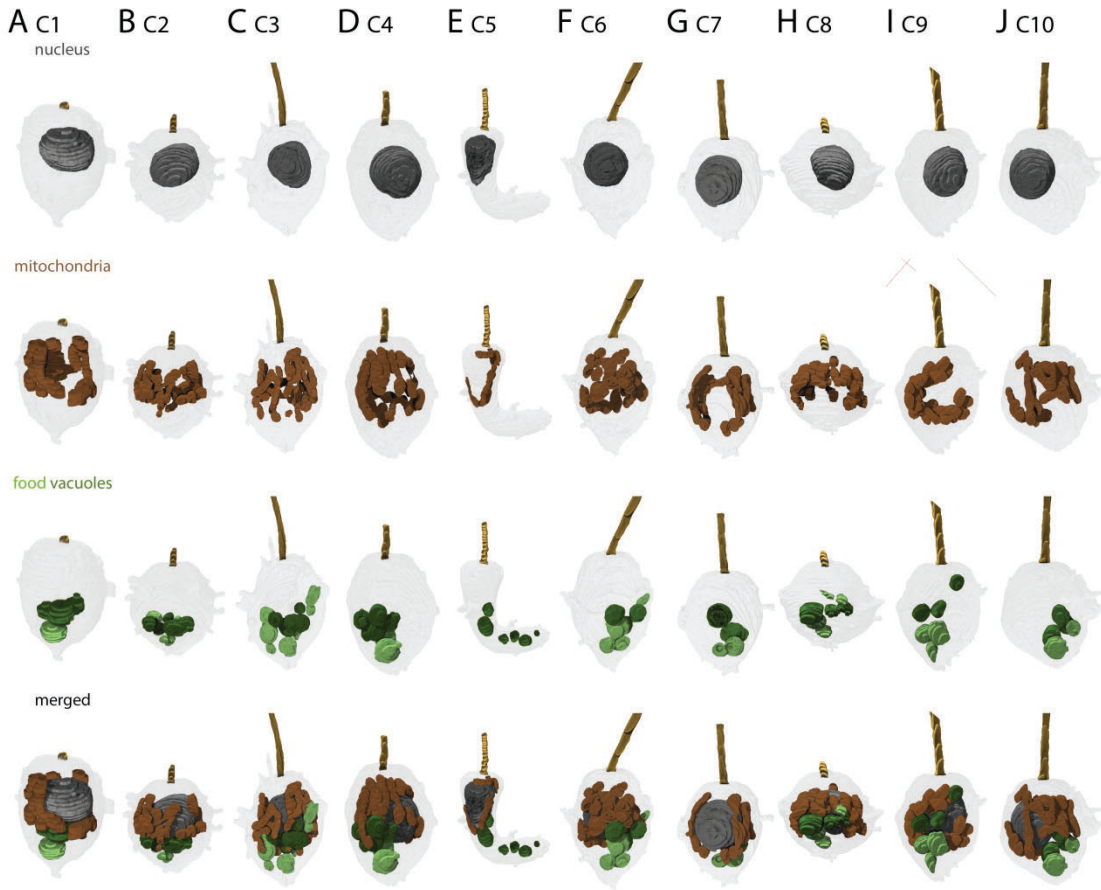

Supplement: Supplementary file [file media-1.pdf]
